# Supplementary material for: Inverse Modulation of Aurora Kinase A and Topoisomerase IIα in Normal and Tumor Breast Cells upon Knockdown of Mitochondrial ASncmtRNA
Source: MDPI journal article supplement (doi:10.3390/ncrna9050059), 2023-10-02
Supplement: s1 [file s1]

**Table S1:** Sequence of primers used for qPCR

| GENE NAME | Forward/Reverse | Sequence (5' – 3')     |
|-----------|-----------------|------------------------|
| AURKA     | Forward         | GTCAAGTCCCCTGTCGGTTC   |
|           | Reverse         | AGTGAGACCCTCTAGCTGTAAT |
| TOP2A     | Forward         | AGTGGAGCTCTCCTAACCGA   |
|           | Reverse         | CATTACAGGCTGCAATGGTGA  |
| COX5B     | Forward         | ATCTGGAGGTGGTGTTCCTCA  |
|           | Reverse         | CCAGACGACGCTGGTATTGT   |
| TIMM50    | Forward         | CAGATCAGGCCGCAGAGATCG  |
|           | Reverse         | TATGTCCGGCGCAACTGCT    |
| 18S       | Forward         | GTAACCCGTTGAACCCCATC   |
|           | Reverse         | CATCCAATCGGTAGTAGCG    |

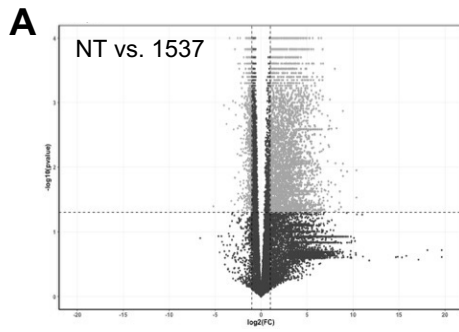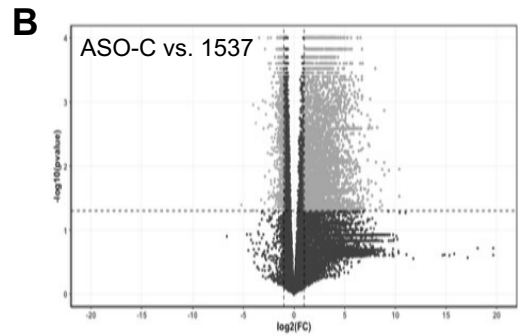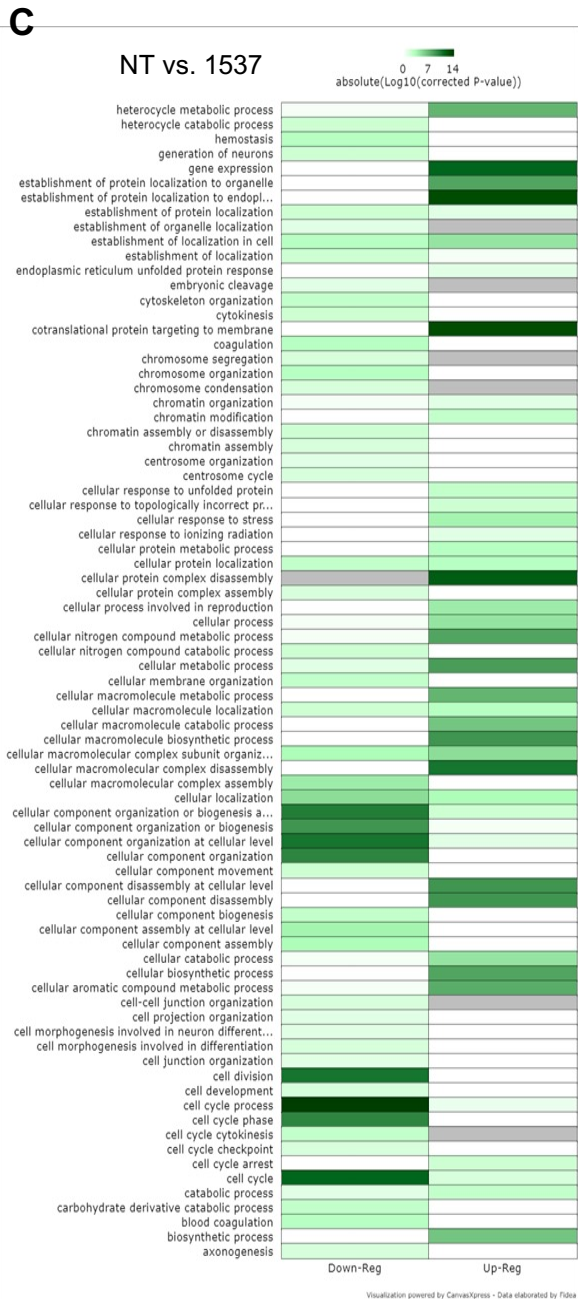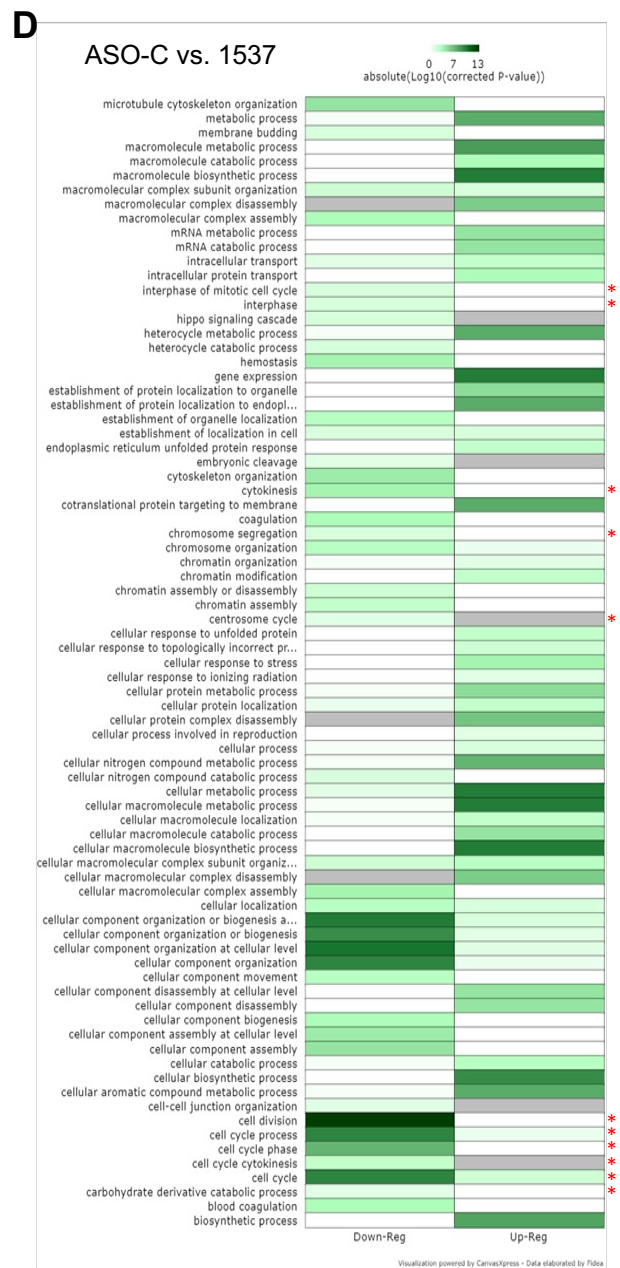

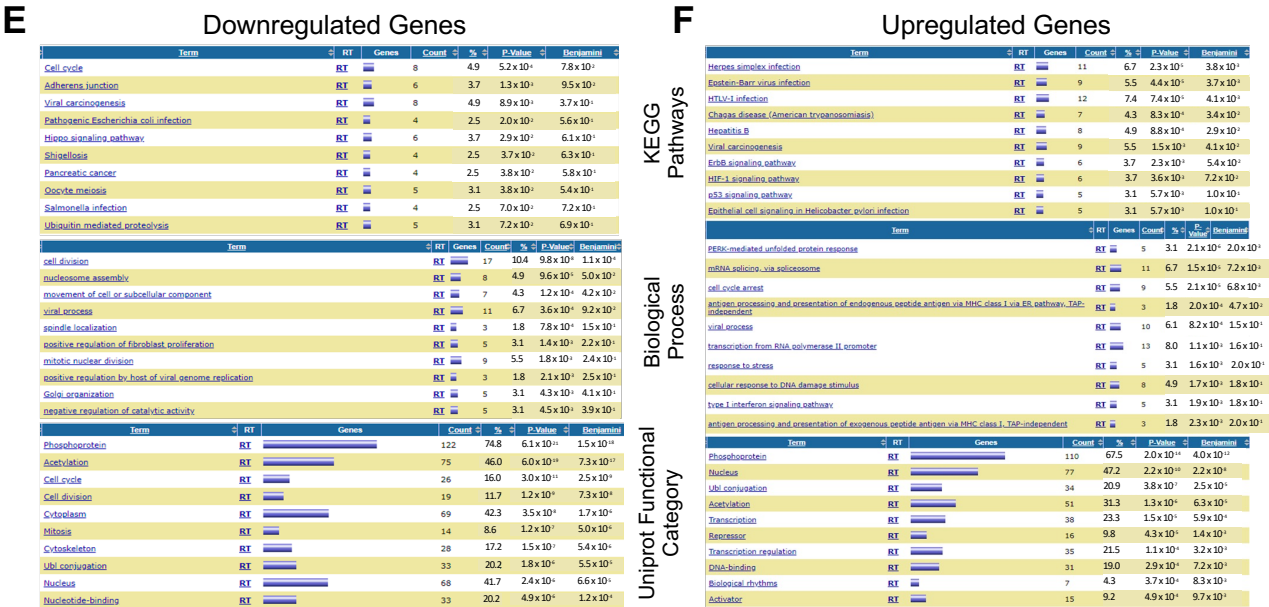

**Figure S1:** Transcriptome data analysis. **A, B**, volcano plots of data comparison between NT and Andes-1537 (**A**) and between ASO-C and Andes-1537 (**B**) showing  $p$ -value and fold-change data. **C, D**,  $p$ -value heatmaps of most significant differentially-expressed genes between NT and Andes-1537 (**C**) and between ASO-C and Andes-1537 (**D**) according to biological function. Categories directly related to cell cycle progression are marked with red asterisks. **E, F**, Gene ontology analysis of differentially-expressed genes for NT vs Andes-1537 and ASO-C vs Andes-1537 (see Fig. 1C). **E**, downregulated genes; **F**, upregulated genes. The first 10 results for each (Kegg Pathways, biological process and Uniprot functional category) are shown.

A

Down-regulated Genes

| N° | ENSEMBL_ID      | Official_name | Description                                       | CB_rank | CB_peak |
|----|-----------------|---------------|---------------------------------------------------|---------|---------|
| 1  | ENSG00000087586 | AURKA         | aurora kinase A                                   | 4       | M       |
| 2  | ENSG00000134690 | CDCA8         | cell division cycle associated 8                  | 5       | G2      |
| 3  | ENSG00000175063 | UBE2C         | ubiquitin conjugating enzyme E2 C                 | 8       | G2      |
| 4  | ENSG00000088325 | TPX2          | TPX2, microtubule nucleation factor               | 9       | M       |
| 5  | ENSG00000131747 | TOP2A         | topoisomerase (DNA) II alpha                      | 14      | G2      |
| 6  | ENSG00000169679 | BUB1          | BUB1 mitotic checkpoint serine/threonine kinase   | 15      | M       |
| 7  | ENSG00000126787 | DLGAP5        | DLG associated protein 5                          | 20      | M       |
| 8  | ENSG00000138160 | KIF11         | kinesin family member 11                          | 30      | G2      |
| 9  | ENSG00000156970 | BUB1B         | BUB1 mitotic checkpoint serine/threonine kinase B | 33      | G2/M    |
| 10 | ENSG00000134057 | CCNB1         | cyclin B1                                         | 49      | M       |
| 11 | ENSG00000136108 | CKAP2         | cytoskeleton associated protein 2                 | 50      | G2/M    |
| 12 | ENSG00000134222 | PSRC1         | proline and serine rich coiled-coil 1             | 81      | G2      |
| 13 | ENSG00000011426 | ANLN          | anillin actin binding protein                     | 89      | M       |
| 14 | ENSG00000157456 | CCNB2         | cyclin B2                                         | 96      | M       |

Up-regulated Genes

| N° | ENSEMBL_ID      | Official_name | Description                                           | CB_rank | CB_peak      |
|----|-----------------|---------------|-------------------------------------------------------|---------|--------------|
| 1  | ENSG00000177606 | JUN           | Jun proto-oncogene, AP-1 transcription factor subunit | 393     | non-periodic |
| 2  | ENSG00000175197 | DDIT3         | DNA damage inducible transcript 3                     | 1568    | non-periodic |
| 3  | ENSG00000116717 | GADD45A       | growth arrest and DNA damage inducible alpha          | 2092    | non-periodic |
| 4  | ENSG00000165891 | E2F7          | E2F transcription factor 7                            | 4207    | non-periodic |
| 5  | ENSG00000125347 | IRF1          | interferon regulatory factor 1                        | 4357    | non-periodic |

B

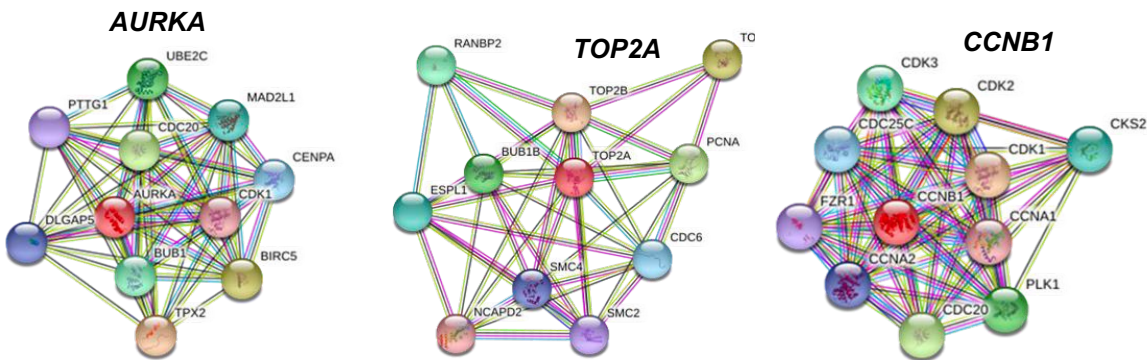

**Figure S2:** Selection of genes of interest. **A**, final list of pre-selected genes for RT-qPCR validation, generated using CycleBase and selecting only cell cycle-related genes. **B**, Interactions of the final 3 genes selected after RT-qPCR validation, obtained using the STRING platform (see Methods).

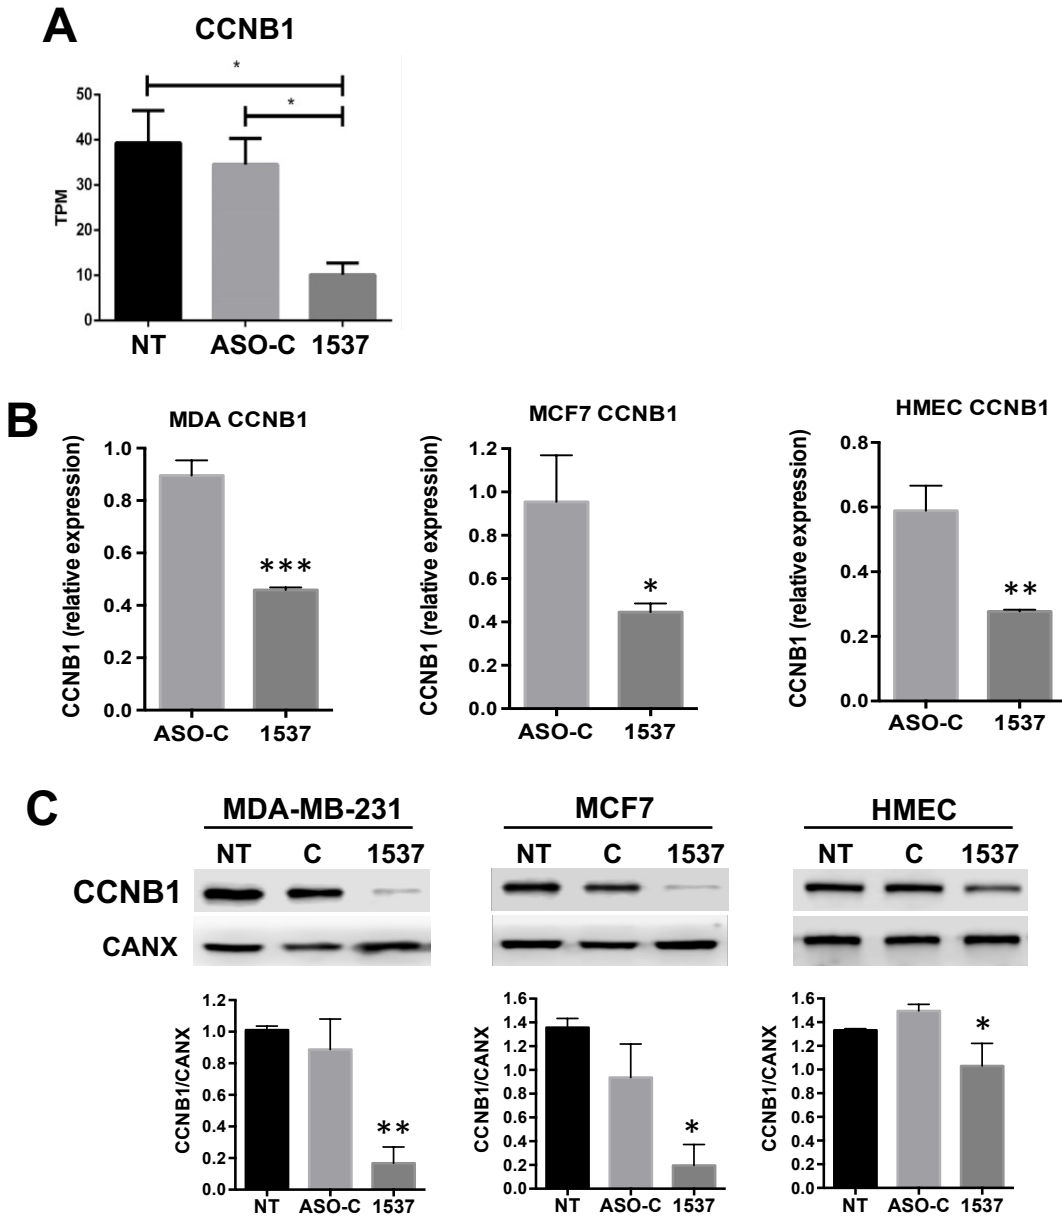

**Figure S3:** Changes in *CCNB1* expression after ASncmtRNA KD. **A**, Relative *CCNB1* levels in MDA-MB-231 cells after a 24 h treatment with Andes-1537, ASO-C or non-treated (NT), obtained from transcriptomic data and expressed in TPM. **B**, *CCNB1* mRNA levels are decreased 2-fold in MDA-MB-231, MCF7 and HMEC, as evidenced by RT-qPCR. Data is presented relative to NT cells. **C**, Cells treated as in B were subjected to Western blot analysis, which showed a reduction in *CCNB1* protein levels in all three cell types, but much more marked in both tumor cell lines compared to normal HMECs. Calnexin (CANX) was used as loading control. \* $p < 0,05$ , \*\* $p < 0,01$ , \*\*\* $p < 0,001$ .
